# Supplementary material for: Bi-functional ion exchangers for enhanced performance of dye-sensitized solar cells
Source: Royal Society of Chemistry journal article supplement (doi:10.1039/c3cc42824a), 2013-01-01
Supplement: c3cc42824a.pdf [file c3cc42824a.pdf]

## Electronic Supplementary Information

# Bi-Functional Ion Exchangers for Enhanced Performance of Dye-Sensitized Solar Cells

**Eui-Hyun Kong,<sup>a</sup> Yong-June Chang,<sup>a</sup> Jongchul Lim,<sup>b</sup> Back-Hyun Kim,<sup>c</sup>  
Jung-Hoon Lee,<sup>a</sup> Do-Kyun Kwon,<sup>c</sup> Taiho Park,<sup>b</sup> and Hyun Myung Jang<sup>\*a</sup>**

<sup>a</sup>*Department of Materials Science and Engineering, and Division of Advanced Materials Science, Pohang University of Science and Technology (POSTECH), Pohang 790-784, Republic of Korea; Email : [hmjang@postech.ac.kr](mailto:hmjang@postech.ac.kr); Tel: +82-54-279-2138; Fax: 82-54-279-2399.*

<sup>b</sup>*Department of Chemical Engineering, Pohang University of Science and Technology (POSTECH), Pohang 790-784, Republic of Korea.*

<sup>c</sup>*Department of Materials Engineering, Korea Aerospace University, Goyang 412-791, Republic of Korea.*

\*Corresponding author

## **Experimental Details and Characterization**

### ***\* Experimental Details***

Bi-layered TiO<sub>2</sub> films were employed in this paper. For an under-layer, a 12-μm-thick transparent nanocrystalline TiO<sub>2</sub> film (particle size: ~20 nm) was deposited onto the FTO (F-doped SnO<sub>2</sub>) glass, and a 6-μm-thick film composed of larger light-scattering TiO<sub>2</sub> particles (particle size: ~400 nm) was printed as an over-layer. Then, they were sintered at 500 °C for 30 min. After cooling down to room temperature, the bi-layered TiO<sub>2</sub> films were immersed in 40 mM TiCl<sub>4</sub> solution at 70 °C for 30 min, and rinsed with deionized water. The TiCl<sub>4</sub>-treated TiO<sub>2</sub> films were heated at 500 °C for 30 min. Finally, the TiO<sub>2</sub> films were dipped in two distinct dye solutions: (i) 0.5 mM N719 dissolved in absolute ethanol (for film A and device A) and (ii) 0.5 mM N719 and 0.3 mM AOT in absolute ethanol (for film B and device B). The counter electrode was prepared by dripping a Pt solution (Solaronix, Platisol T) on the FTO glass substrate, which was followed by thermal treatment at 500 °C for 30 min. For the cell assembly, a hot-melt 60-μm-thick Surlyn (Solaronix, Meltonix 1170-60) was used as a spacer between the working electrode and the Pt electrode. The electrolyte composed of 0.7 M BMII-0.03 M I<sub>2</sub>-0.1 M guanidine thiocyanate-0.5 M 4-tert-butylpyridine in an AC/VN solution was used for devices.

### ***\* Characterization***

The TiO<sub>2</sub> electrodes were analyzed by attenuated total reflectance FTIR (ATR-FTIR) spectrometry (Hyperion, Bruker). UV-Vis absorption spectra were recorded on an Optizen POP spectrophotometer. The photovoltaic performance was measured under an illumination of a solar simulator (Newport, Oriel class A, 92251A) at one sun (AM 1.5, 100 mW·cm<sup>-2</sup>) with an active area of 0.25 cm<sup>2</sup>. Electrical impedance spectra were obtained using an impedance analyzer (BioLogic, SP-300), with a frequency ranging from 10<sup>-1</sup> to 10<sup>6</sup> Hz, and analyzed using Z-view software. The chemical bonding states of the samples were examined by using X-ray photoelectron spectroscopy (XPS, K-alpha (Thermo VG, U.K.) with an Al monochromated X-ray sources (Al Kα line: 1486.6 eV).

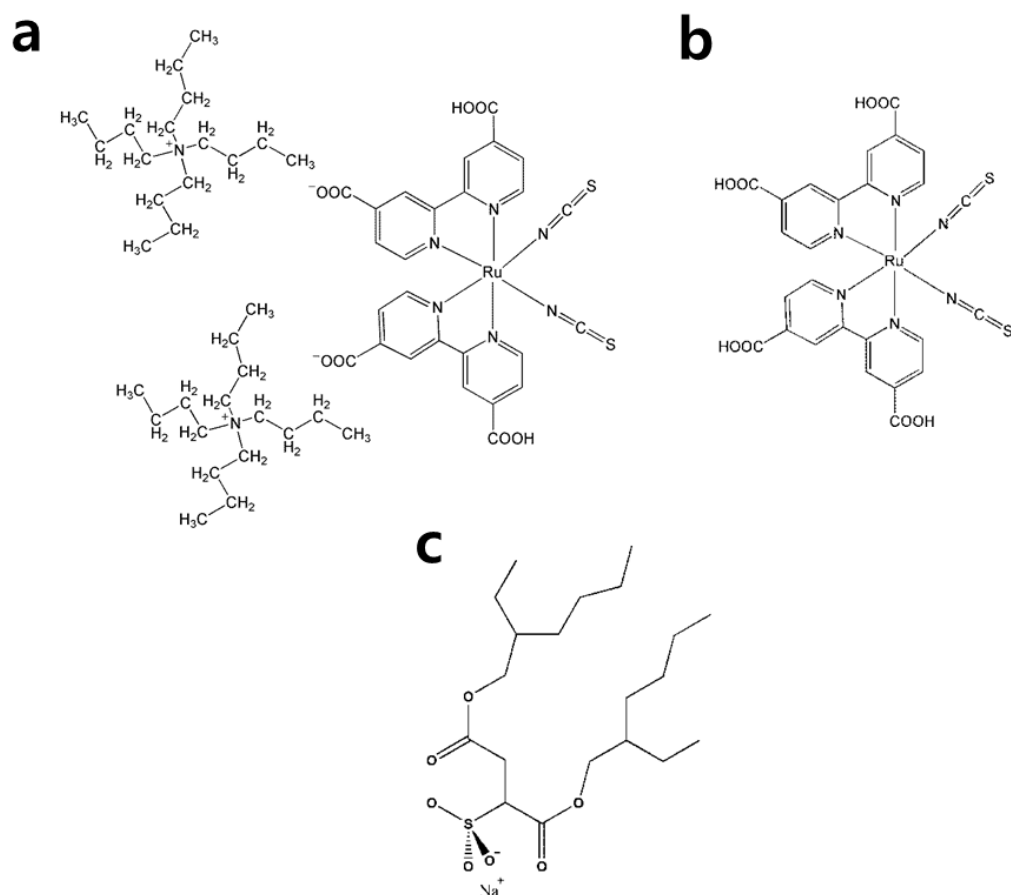

**Figure S1.** Chemical structures of (a) N719, (b) N3, and (c) AOT molecules.

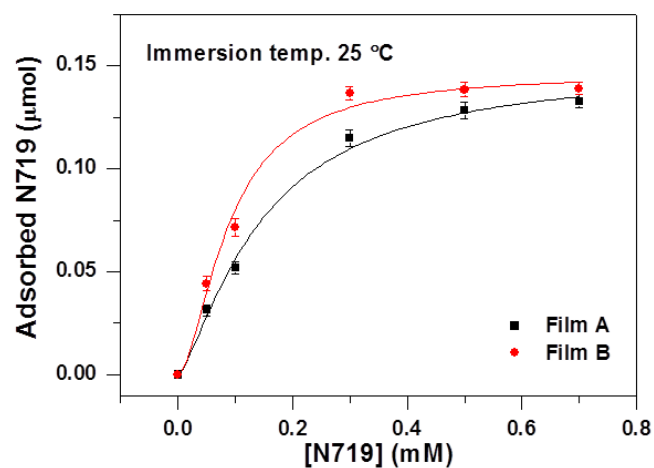

**Figure S2.** The amount of the adsorbed N719 dye on the  $\text{TiO}_2$  surface as a function of the concentration of N719 in absolute ethanol without (film A) and with AOT (film B).

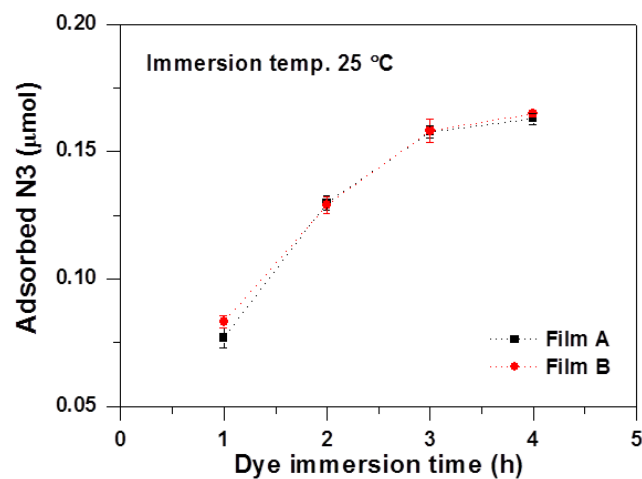

**Figure S3.** The amount of the adsorbed N3 molecules at various immersion times at 25 °C in absolute ethanol without (film A) and with AOT (film B).

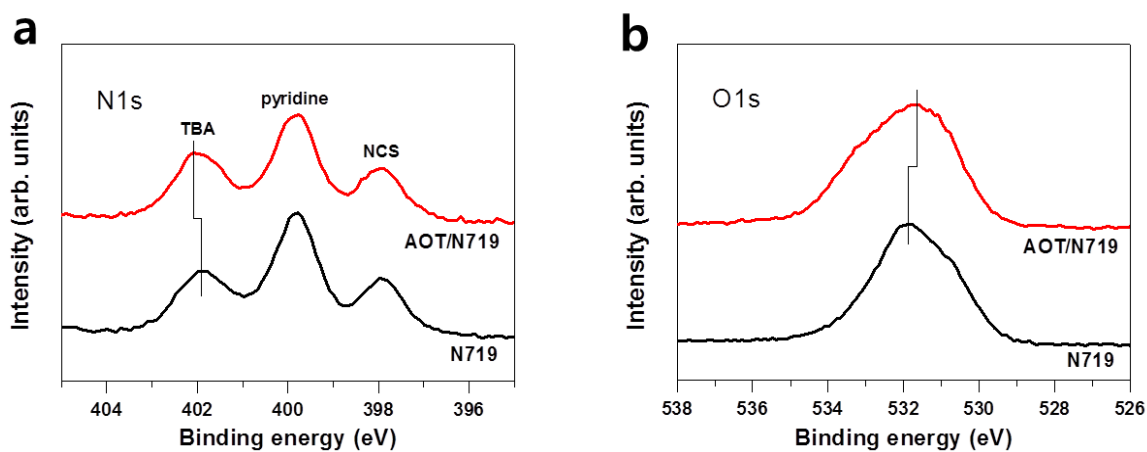

**Figure S4.** XPS spectra for N1s (a) and O1s (b) of multi-layers of AOT/N719 and N719.

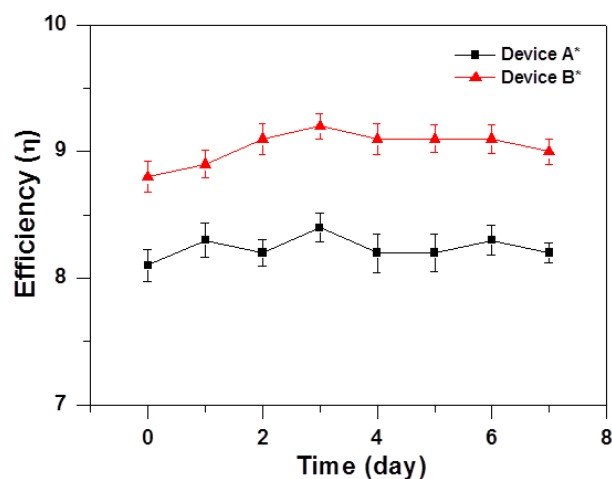

**Figure S5.** Time evolution of the conversion efficiency ( $\eta$ ) of DSCs without (device A\*) and with AOT (device B\*).

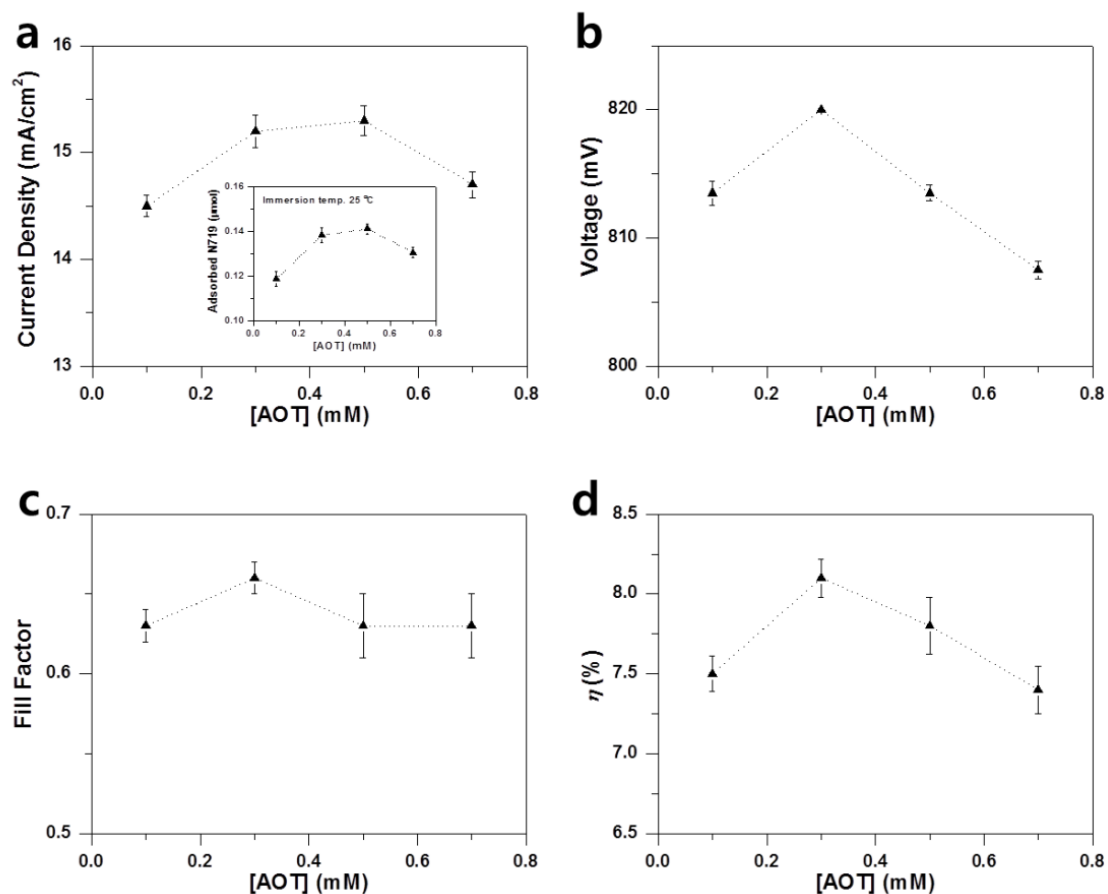

**Figure S6.** Photovoltaic properties (**a.** current density; **b.** voltage; **c.** fill factor; **d.** efficiency) at various AOT concentrations under a fixed N719 concentration (0.5 mM). The inset of **Fig. 6(a)** shows the amount of the adsorbed dye molecules along with the AOT concentration.

**Table S1.** Photovoltaic parameters of devices A, A\*, B, and B\*.

| Sample    | $V_{oc}$ (mV) | $J_{sc}$ (mA/cm <sup>2</sup> ) | $FF$        | $\eta$ (%) |
|-----------|---------------|--------------------------------|-------------|------------|
| Device A  | 802 ± 0.25    | 13.7 ± 0.11                    | 0.66 ± 0.01 | 7.3 ± 0.09 |
| Device A* | 796 ± 0.39    | 15.8 ± 0.19                    | 0.67 ± 0.02 | 8.4 ± 0.11 |
| Device B  | 820 ± 0.12    | 15.2 ± 0.15                    | 0.66 ± 0.01 | 8.1 ± 0.12 |
| Device B* | 817 ± 0.36    | 17.0 ± 0.23                    | 0.66 ± 0.01 | 9.2 ± 0.08 |

\*: presence of the scattering over-layer
